# Supplementary material for: Thermal stress-assisted annealing to improve the crystalline quality of an epitaxial YSZ buffer layer on Si
Source: Royal Society of Chemistry journal article supplement (doi:10.1039/d2tc01665f), 2022-01-01
Supplement: d2tc01665f1.pdf [file d2tc01665f1.pdf]

## Supplementary Information

### Thermal stress-assisted annealing to improve the crystalline quality of epitaxial YSZ buffer layer on Si

Hyung-Jin Choi<sup>1</sup>, Jinhyuk Jang<sup>2</sup>, Soo Young Jung<sup>1,3</sup>, Ruiguang Ning<sup>1,4</sup>, Min-Seok Kim<sup>1,5</sup>, Sung-Jin Jung<sup>1</sup>, Jun Young Lee<sup>1</sup>, Jin Soo Park<sup>6,7</sup>, Byung Chul Lee<sup>6</sup>, Ji-Soo Jang<sup>1</sup>, Seong Keun Kim<sup>1,8</sup>, Kyu Hyoung Lee<sup>9,10</sup>, June Hyuk Lee<sup>11</sup>, Sung Ok Won<sup>12</sup>, Yulan Li<sup>13</sup>, Shenyang Hu<sup>13</sup>, Si-Young Choi<sup>2</sup>, and Seung-Hyub Baek<sup>1,4,9,10\*</sup>

<sup>1</sup>*Electronic Materials Research Center, Korea Institute of Science and Technology, Seoul 02792, South Korea*

<sup>2</sup>*Department of Materials Science and Engineering, Pohang University of Science and Technology (POSTECH), Pohang 37673, Republic of Korea*

<sup>3</sup>*Department of Materials Science and Engineering, Seoul National University (SNU), Seoul 08826, Republic of Korea*

<sup>4</sup>*Division of Nano & Information Technology, KIST School, Korea University of Science and Technology, Seoul 02792, South Korea*

<sup>5</sup>*Department of Materials Science and Engineering, Research Institute of Advanced Materials, Seoul National University, Seoul, 08826, Republic of Korea*

<sup>6</sup>*Center for BioMicrosystems, Korea Institute of Science and Technology, Seoul 02792, Republic of Korea*

<sup>7</sup>*Department of Electrical Engineering, Korea University, Seoul 02841, Republic of Korea*

<sup>8</sup>*KU-KIST Graduate School of Converging Science and Technology, Korea University, Seoul 02841, South Korea*

<sup>9</sup>*Department of Materials Science and Engineering, Yonsei University, Seoul 03722, Republic of Korea*

<sup>10</sup>*Yonsei-KIST Convergence Research Institute, Korea Institute of Science and Technology, Seoul 02792, Republic of Korea*

<sup>11</sup>*Neutron Science Division, Korea Atomic Energy Research Institute, Daejeon, 34057, Republic of Korea*

<sup>12</sup>*Advanced Analysis Center, Korea Institute of Science and Technology, Seoul, 02792, Republic of Korea*

<sup>13</sup>*Pacific Northwest National Laboratory, 902 Battelle Blvd., Richland, WA 99354, USA*

\*To whom correspondence should be addressed. E-mail: shbaek77@kist.re.kr

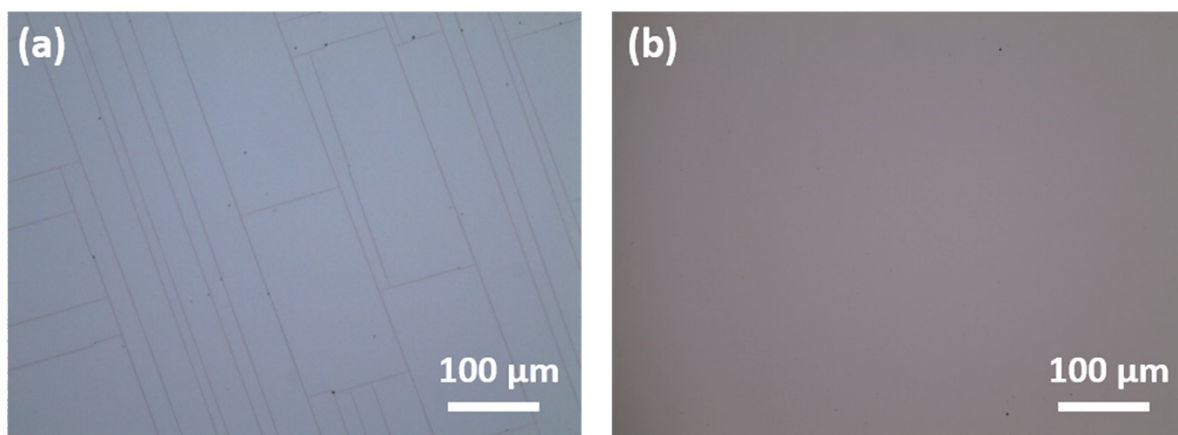

**Figure S1.** Optical images of (a) epitaxial CeO<sub>2</sub> (35 nm) film on YSZ single crystal, and (b) the most tensile-strained epitaxial YSZ (45 nm) film on Si.

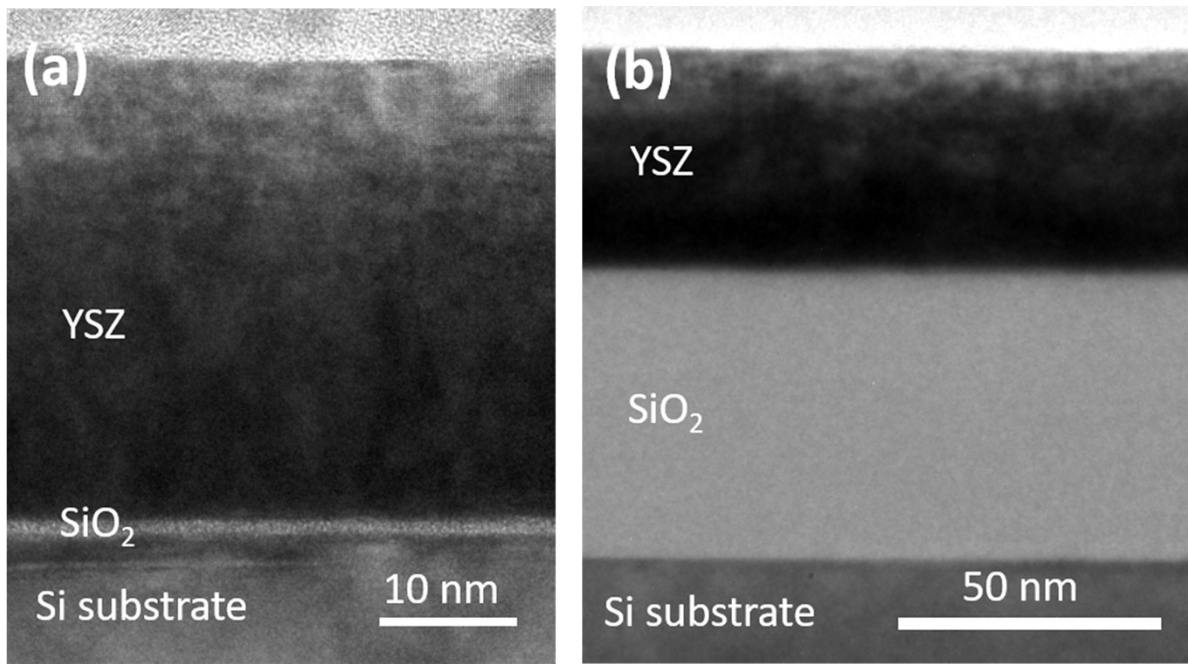

**Figure S2.** Cross-sectional TEM images of (a) the as-grown and (b) annealed YSZ/Si.

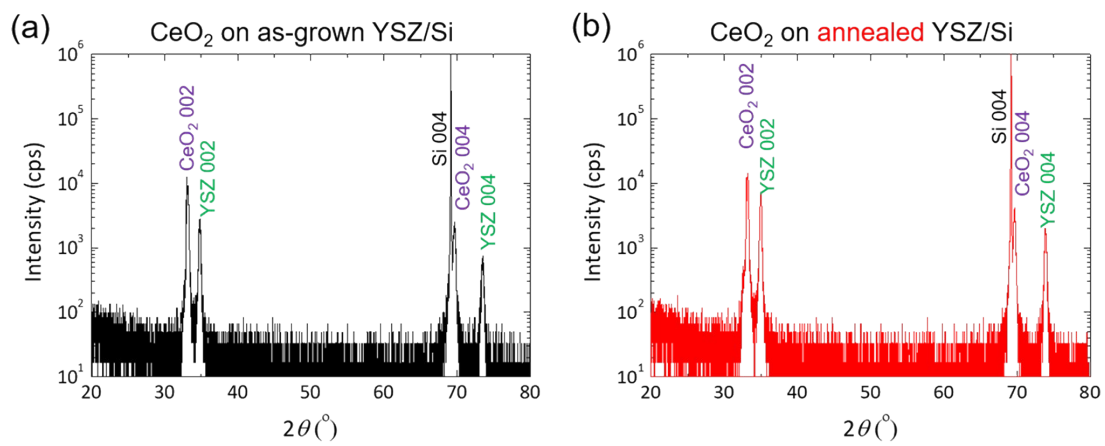

**Figure S3.**  $\theta$ - $2\theta$  scan of epitaxial  $\text{CeO}_2$  thin films on (a) as-grown and (b) annealed YSZ/Si.

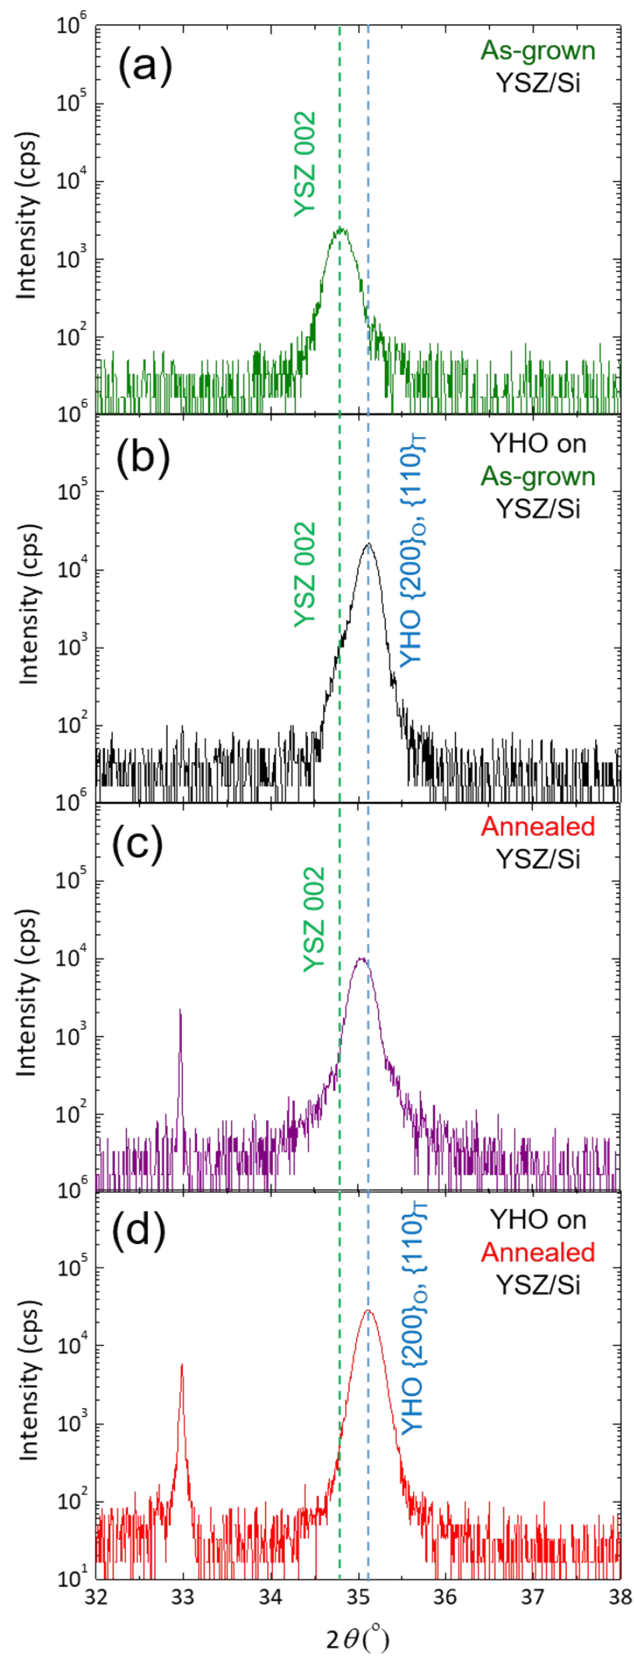

**Figure S4.**  $\theta$ - $2\theta$  XRD patterns of (a) as-grown YSZ/Si, (b) Y:HfO<sub>2</sub> on the as-grown YSZ/Si, (c) annealed YSZ/Si, and (d) Y:HfO<sub>2</sub> on the annealed YSZ/Si
